# Supplementary material
Source: PubMed Central journal article supplement (PMC7226685)
Supplement: UEG902353_Supplemental_Material.pdf [file UEG902353_Supplemental_Material.pdf]

## Supplementary references

1. Abid M, Guirat A, Ayadi L, *et al.* Pancreatic tuberculosis: a rare cause of pseudoneoplastic obstructive jaundice. *Presse Med.* 2009;38:e7-e10.
2. Aggarwal P, Wali JP, Jain R, *et al.* Tubercular abscess of the pancreas. *Am J Gastroenterol.* 1989;84:985-6.
3. Ahlawat SK, Charabaty-Pishvaian A, Lewis JH, *et al.* Pancreatic tuberculosis diagnosed with endoscopic ultrasound guided fine needle aspiration. *JOP.* 2005;6:598-602.
4. Albu E, Yousuf AM, Swaminathan K, *et al.* Tuberculous and nontuberculous mycobacterial infection of the pancreas in a patient with AIDS. *Pancreas.* 1996;12:412-3.
5. Allen JR, Bauer LA, Evans L, *et al.* Primary pancreatic tuberculosis. *Mo Med.* 1991;88:766-8.
6. Avasthi R, Chaudhary SC, Jain P. Disseminated tuberculosis manifesting as chronic pancreatitis. *Indian J Tuberc.* 2008;55:214-6.
7. Babu RD, John V. Pancreatic tuberculosis: case report and review of the literature. *Trop Gastroenterol.* 2001;22:213-4.
8. Baraboutis I, Skoutelis A. Isolated tuberculosis of the pancreas. *JOP.* 2004;5(3):155-8.
9. Barbalinardo RJ, Hamilton GB, Eliot GR, *et al.* Tuberculous retroperitoneal lymphadenopathy mimicking metastatic pancreatic carcinoma. *J Natl Med Assoc.* 1986;78:385-7.
10. Bazaz ML, Hossain J, Ashkar K, *et al.* An unusual case of abdominal pain: Pancreatic tuberculosis. *Ann Saudi Med.* 1991;11:226-7.
11. Berson BD, Mendelson DS, Janus CL. Tuberculous abscess of the pancreas in AIDS: CT findings. *Mt Sinai J Med.* 1989;56:297-9.
12. Bhatia V, Garg PK, Arora VK, *et al.* Isolated pancreatic tuberculosis mimicking intraductal pancreatic mucinous tumor. *Gastrointest Endosc.* 2008;68:610-1.
13. Brugge WR, Mueller PR, Misdraji J. Case records of the Massachusetts General Hospital. Weekly clinicopathological exercises. Case 8-2004. A 28-year-old man with abdominal pain, fever, and a mass in the region of the pancreas. *N Engl J Med.* 2004;350:1131-8.
14. Brusko G, Melvin WS, Fromkes JJ, *et al.* Pancreatic tuberculosis. *Am Surg.* 1995;61:513-5.
15. Cappell MS, Javeed M. Pancreatic abscess due to mycobacterial infection associated with the acquired immunodeficiency syndrome. *J Clin Gastroenterol.* 1990;12:423-9.
16. Chandrasekhara KL, Iyer SK, Stanek AE, *et al.* Pancreatic tuberculosis mimicking carcinoma. *Gastrointest Endosc.* 1985;31:386-8.
17. Chen CH, Yang CC, Yeh YH, *et al.* Pancreatic tuberculosis with obstructive jaundice--a case report. *Am J Gastroenterol.* 1999;94:2534-6.
18. Cheng R, Grieco VS, Shuhart MC, *et al.* EUS-guided FNA diagnosis of pancreatic tuberculosis. *Gastrointest Endosc.* 2006;6:660-3.
19. Cho KC, Lucak SL, Delany HM, *et al.* CT appearance in tuberculous pancreatic abscess. *J Comput Assist Tomogr.* 1990;14:152-4.
20. Coelho JC, Wiederkehr JC, Parolin MB, *et al.* Isolated tuberculosis of the pancreas after orthotopic liver transplantation. *Liver Transpl Surg.* 1999;5:153-5.
21. Crook LD, Johnson FP Jr. Tuberculosis of the pancreas: a case report. *Tubercle.* 1988;69:148-51.

22. Crowson MC, Perry M, Burden E. Tuberculosis of the pancreas: a rare cause of obstructive jaundice. *Br J Surg.* 1984;71:239.
23. Dang S, Atiq M, Saccente M, Olden KW, *et al.* Isolated tuberculosis of the pancreas: a case report. *JOP.* 2009;10:64-6.
24. Dasgupta TK, Sengupta G, Mukherji B, *et al.* Tuberculous peripancreatic abscess. Case report. *Eur J Surg.* 1994;160:449-50.
25. David AW, Eapen A, Vyas FL, *et al.* The pancreas and tuberculosis: a diagnostic challenge. *Indian J Gastroenterol.* 2008;27:29-30.
26. D'Cruz S, Sachdev A, Kaur L, *et al.* Fine needle aspiration diagnosis of isolated pancreatic tuberculosis. A case report and review of literature. *JOP.* 2003;4:158-62.
27. de Miguel F, Beltran J, Sabas JA, *et al.* Tuberculous pancreatic abscess. *Br J Surg.* 1985;72:438.
28. Demir K, Kaymakoglu S, Basisik F, *et al.* Solitary pancreatic tuberculosis in immunocompetent patients mimicking pancreatic carcinoma. *J Gastroenterol Hepatol.* 2001;16:1071-4.
29. Desai DC, Swaroop VS, Mohandas KM, *et al.* Tuberculosis of the pancreas: report of three cases. *Am J Gastroenterol.* 1991 ;86:761-3.
30. Desmond NM, Kingdon E, Beale TJ, Coker RJ, *et al.* Tuberculous pancreatic abscess: an unusual manifestation of HIV infection. *J R Soc Med.* 1995;88:109P-110P.
31. Dhall JC, Bishnoi PK, Dalal AK, *et al.* Tuberculosis of the pancreas: a clinical rarity. *Am J Gastroenterol.* 1997;92:172
32. Echenique Elizondo M, Amondarain Arratibel J, Compton CC, *et al.* Tuberculosis of the pancreas. *Surgery.* 2001;129:114-6.
33. Evans JD, Hamanaka Y, Olliff SP, *et al.* Tuberculosis of the pancreas presenting as metastatic pancreatic carcinoma. A case report and review of the literature. *Dig Surg.* 2000;17:183-7.
34. Eyal AS, Karusseit VO. Tuberculosis of the pancreas mimicking carcinoma. *Int J Infect Dis.* 2008;12:108-10.
35. Eyer-Silva WA, de Sá CA, Pinto JF, *et al.* Pancreatic tuberculosis as a manifestation of infection with the human immunodeficiency virus. *Clin Infect Dis.* 1993;16:332.
36. Ezratty A, Gumaste V, Rose E, *et al.* Pancreatic tuberculosis: a frequently fatal but potentially curable disease. *J Clin Gastroenterol.* 1990;12:74-7.
37. Fan ST, Yan KW, Lau WY, *et al.* Tuberculosis of the pancreas: a rare cause of massive gastrointestinal bleeding. *Br J Surg.* 1986;73:373.
38. Felekouras E, Karavokyros IG, Griniatsos J, *et al.* Pancreatic tuberculosis: a medical disease posing surgical dilemmas. *Int Surg.* 2006;91:168-73.
39. Fenkel JM, Spodik M, Singu BS, *et al.* Tubercular pancreatic abscess presenting as Fever and cystic pancreatic lesion with endoscopic management. *Dig Dis Sci.* 2010;55:2118-20.
40. Fernández del Castillo C, González-Ojeda A, Reyes E, *et al.* Tuberculosis of the pancreas. *Pancreas.* 1990;5:693-6.
41. Fischer G, Spengler U, Neubrand M, *et al.* Isolated tuberculosis of the pancreas masquerading as a pancreatic mass. *Am J Gastroenterol.* 1995;90:2227-30.
42. Foo FJ, Verbeke CS, Guthrie JA, *et al.* Pancreatic and peripancreatic tuberculosis mimicking malignancy. *JOP.* 2007;8:201-5.

43. Franco-Paredes C, Leonard M, Jurado R, *et al.* Tuberculosis of the pancreas: report of two cases and review of the literature. *Am J Med Sci.* 2002 ;323:54-8.
44. Gupta P, Guleria S, Agarwal S. Role of endoscopic ultrasound guided FNAC in diagnosis of pancreatic TB presenting as mass lesion: a case report and review of literature. *Indian J Tuberc.* 2011;58:120-4.
45. Hari S, Seith A, Srivastava DN, *et al.* Isolated tuberculosis of the pancreas diagnosed with needle aspiration: a case report and review of the literature. *Trop Gastroenterol.* 2005;26:141-3.
46. Hashimoto M, Koyama H, Noie T, *et al.* Abdominal tuberculoma mimicking a pancreatic neoplasm: report of a case. *Surg Today.* 1995;25:365-8.
47. Ibrahim EM, Al-Sohaibani MO, Al-Suleiman SA, *et al.* Tuberculosis of the pancreas: a rare cause of obstructive jaundice and portal hypertension. *Trop Gastroenterol.* 1987;8:167-72.
48. Irfan M, Thiavalappil F, Nagaraj J, *et al.* Tuberculous pancreatitis complicated by ruptured splenic artery pseudoaneurysm. *Monaldi Arch Chest Dis.* 2013;79:134-5.
49. Jaber B, Gleckman R. Tuberculous pancreatic abscess as an initial AIDS-defining disorder in a patient infected with the human immunodeficiency virus: case report and review. *Clin Infect Dis.* 1995;20:890-4.
50. Jagose JT, Iyer VK, Kirpalani AL, *et al.* Tuberculous pancreatic abscess presenting as acute pancreatitis in a renal transplant recipient. *Am J Gastroenterol.* 1998;93:486-7.
51. Jena GP, Manoharan GR, Mbete DL, *et al.* Tuberculous pancreatic abscess in HIV-positive patients. A report of 3 cases and a review of the literature. *S Afr J Surg.* 1999;37:69-71.
52. Jenney AW, Pickles RW, Hellard ME, *et al.* Tuberculous pancreatic abscess in an HIV antibody-negative patient: case report and review. *Scand J Infect Dis.* 1998;30:99-104.
53. Karia K, Mathur SK. Tuberculous cold abscess simulating pancreatic pseudocyst. *J Postgrad Med.* 2000;46:33-4.
54. Kaushik N, Schoedel K, McGrath K. Isolated pancreatic tuberculosis diagnosed by endoscopic ultrasound-guided fine needle aspiration: a case report. *JOP.* 2006 Mar 9;7:205-10.
55. Khaniya S, Koirala R, Shakya VC, *et al.* Isolated pancreatic tuberculosis mimicking as carcinoma: a case report and review of the literature. *Cases J.* 2010;3:18.
56. Kitai IC, Harid AC, Matenga JA. Tuberculosis of the pancreas mimicking carcinoma: report of a case. *Cent Afr J Med.* 1987;33:19-22.
57. Knowles KF, Saltman D, Robson HG, *t al.* Tuberculous pancreatitis. *Tubercle.* 1990;71:65-8.
58. Koduri VG, Janardhanan R, Hagan P Jr, *et al.* Pancreatic TB: diagnosis by needle aspiration. *Am J Gastroenterol.* 1992;87:1206-8.
59. Kouraklis G, Glinavou A, Karayiannakis A, *et al.* Primary tuberculosis of the pancreas mimicking a pancreatic tumor. *Int J Pancreatol.* 2001;29:151-3.
60. Ladas SD, Vaidakis E, Lariou C, *et al.* Pancreatic tuberculosis in non-immunocompromised patients: reports of two cases, and a literature review. *Eur J Gastroenterol Hepatol.* 1998;10:973-6.
61. Lal R, Mishra B, Dogra V, *et al.* Tubercular pancreatic abscess: a case report. *Indian J Med Microbiol.* 2003;21:61-2.

62. Levine R, Tenner S, Steinberg W, *et al.* Tuberculous abscess of the pancreas. Case report and review of the literature. *Dig Dis Sci.* 1992;37:1141-4.
63. Liu Q, He Z, Bie P. Solitary pancreatic tuberculous abscess mimicking pancreatic cystadenocarcinoma: a case report. *BMC Gastroenterol.* 2003;3:1. Epub 2003 Jan 10.
64. Lo SF, Ahchong AK, Tang CN, *et al.* Pancreatic tuberculosis: case reports and review of the literature. *J R Coll Surg Edinb.* 1998;43:65-8.
65. Loya AC, Prayaga AK, Sundaram C, *et al.* Cytologic diagnosis of pancreatic tuberculosis in immunocompetent and immunocompromised patients: a report of 2 cases. *Acta Cytol.* 2005;49:97-100.
66. Lupatkin H, Bräu N, Flomenberg P, *et al.* Tuberculous abscesses in patients with AIDS. *Clin Infect Dis.* 1992;14:1040-4.
67. Machado MA, Herman P, Montagnini AL, *et al.* Pancreatic tuberculosis: a rare condition mimicking pancreatic cystadenoma. *Pancreas.* 1998;17:315-6.
68. Meesiri S. Pancreatic tuberculosis with acquired immunodeficiency syndrome: a case report and systematic review. *World J Gastroenterol.* 2012;18:720-6.
69. Meinke AK. Pancreatic tuberculous abscess. *Conn Med.* 1989;53:139-41.
70. Mokoena T, Bairagi N. Acute tuberculous pancreatitis associated with HIV infection. *Trop Doct.* 1994;24:172-3.
71. Morris DL, Wilkinson LS, al Mokhtar N. Case report: emphysematous tuberculous pancreatitis diagnosis by ultrasound and computed tomography. *Clin Radiol.* 1993;48:286-7.
72. Mourad FH, McLean A, Farthing MJ. Tuberculous pancreatitis: a diagnostic problem. Case report and review of literature. *J Clin Gastroenterol.* 1995;20:237-40.
73. Netherland NA, Chen VK, Eloubeidi MA. Intra-abdominal tuberculosis presenting with acute pancreatitis: diagnosis by endoscopic ultrasound-guided fine-needle aspiration. *Dig Dis Sci.* 2006;51:247-51.
74. O'Donoghue DJ, Short CD, Gokal R, *et al.* Pancreatic tuberculosis following renal transplantation. *Nephron.* 1992;60:367.
75. Ozden I, Emre A, Demir K, *et al.* Solitary pancreatic tuberculosis mimicking advanced pancreatic carcinoma. *J Hepatobiliary Pancreat Surg.* 2001;8:279-83.
76. Ozkan F, Bulbuloglu E, Inci MF, *et al.* Isolated pancreatic tuberculosis mimicking malignancy and causing obstructive jaundice. *J Gastrointest Cancer.* 2013;44:118-20.
77. Pandya G, Dixit R, Shelat V, *et al.* Obstructive jaundice: a manifestation of pancreatic tuberculosis. *J Indian Med Assoc.* 2007;105:133-4
78. Panzuto F, D'Amato A, Laghi A, *et al.* Abdominal tuberculosis with pancreatic involvement: a case report. *Dig Liver Dis.* 2003;35:283-7.
79. Park AJ. Pancreatic tubercular abscess. *Pancreas.* 1993;8:137-8.
80. Patankar T, Prasad S, Laxminarayan R. Diabetes mellitus: an uncommon manifestation of pancreatic tuberculosis. *J Assoc Physicians India.* 1999;47:938-9.
81. Pramesh CS, Heroor AA, Gupta SG, *et al.* Pancreatic tuberculosis: an elusive diagnosis. *HPB (Oxford).* 2003;5:43-5.
82. Raghavan P, Rajan D. Isolated pancreatic tuberculosis mimicking malignancy in an immunocompetent host. *Case Rep Med.* 2012;2012:501246. Epub 2012 Apr 24.
83. Redha S, Suresh RL, Subramaniam J, *et al.* Pancreatic tuberculosis presenting with recurrent acute pancreatitis. *Med J Malaysia.* 2001;56:95-7.

84. Rezeig MA, Fashir BM, Al-Suhaibani H, *et al.* Pancreatic tuberculosis mimicking pancreatic carcinoma: four case reports and review of the literature. *Dig Dis Sci.* 1998;43:329-31.
85. Riaz AA, Singh A, Robshaw P, *et al.* Tuberculosis of the pancreas diagnosed with needle aspiration. *Scand J Infect Dis.* 2002;34(4):303-4.
86. Rong Y, Lou W, Jin D. Pancreatic tuberculosis with splenic tuberculosis mimicking advanced pancreatic cancer with splenic metastasizes: a case report. *Cases J.* 2008 12;1:84.
87. Rushing JL, Hanna CJ, Selecky PA. Pancreatitis as the presenting manifestation of miliary tuberculosis. *West J Med.* 1978;129:432-6.
88. Ruttenberg D, Graham S, Burns D, *et al.* Abdominal tuberculosis--a cause of portal vein thrombosis and portal hypertension. *Dig Dis Sci.* 1991;36:112-5.
89. Sachdev A, D'Cruz S, Chauhan S, *et al.* Pancreaticobiliary tuberculosis diagnosed by endoscopic brushings. *JOP.* 2006;7:665-9.
90. Saluja SS, Ray S, Pal S, *et al.* Hepatobiliary and pancreatic tuberculosis: a two decade experience. *BMC Surg.* 2007 24;7:10.
91. Sanabe N, Ikematsu Y, Nishiwaki Y, *et al.* Pancreatic tuberculosis. *J Hepatobiliary Pancreat Surg.* 2002;9:515-8.
92. Sandoz JC, Martinez H, Kellett H, *et al.* Pancreatic tuberculosis. *Conn Med.* 1999;63:531-3.
93. Schneider A, von Birgelen C, Dührsen U, *et al.* Two cases of pancreatic tuberculosis in nonimmunocompromised patients. A diagnostic challenge and a rare cause of portal hypertension. *Pancreatology.* 2002;2:69-73.
94. Shan YS, Sy ED, Lin PW. Surgical resection of isolated pancreatic tuberculosis presenting as obstructive jaundice. *Pancreas.* 2000;21:100-1.
95. Singh D, Singh R, Clarkston WK. Image of the month. Pancreatic tuberculosis in a patient with human immunodeficiency virus: a rare diagnosis. *Clin Gastroenterol Hepatol.* 2009;7:e40-1.
96. Singhai P, Gadhadh R, Joshi S, *et al.* Isolated Pancreatic Tuberculosis in an Immunocompetent Host. *J Assoc Physicians India.* 2017;65:98-100.
97. Small G, Wilks D. Pancreatic mass caused by Mycobacterium tuberculosis with reduced drug sensitivity. *J Infect.* 2001;42:201-2.
98. Song TJ, Lee SS, Park DH, *et al.* Yield of EUS-guided FNA on the diagnosis of pancreatic/peripancreatic tuberculosis. *Gastrointest Endosc.* 2009;69:484-91.
99. Sözbilen M, Erhan Y, Koyuncu A. Tuberculosis of the pancreas. *Br J Surg.* 1992;79:802.
100. Sportes A, Kpossou R, Bernardin S. Isolated pancreatic tuberculosis mimicking inoperable pancreatic cancer: a diagnostic challenge resolved using endoscopic ultrasound-guided fine-needle aspiration. *Can J Gastroenterol.* 2013;27:445-7.
101. Stambler JB, Klibaner MI, Bliss CM, *et al.* Tuberculous abscess of the pancreas. *Gastroenterology.* 1982;83:922-5.
102. Stock KP, Riemann JF, Stadler W, *et al.* Tuberculosis of the pancreas. *Endoscopy.* 1981;13:178-80.
103. Sun SL, Gao F, Cui DX, *et al.* Isolated pancreatic tuberculosis in non-immunocompromised patient treated by Whipple's procedure: a case report. *Chin Med Sci J.* 2014;29:58-60.
104. Takhtani D, Gupta S, Suman K, *et al.* Radiology of pancreatic tuberculosis: a report of three cases. *Am J Gastroenterol.* 1996;91:1832-4.

105. Tan KK, Chen K, Liao KH, *et al.* Pancreatic tuberculosis mimicking pancreatic carcinoma: series of three cases. *Eur J Gastroenterol Hepatol.* 2009;21:1317-9.
106. Tetzeli JP, Pisegna JR, Barkin JS. Tuberculous pancreatic abscess as a manifestation of AIDS. *Am J Gastroenterol.* 1989;84:581-2.
107. Tosun S, Tosun A. Imaging of malignancy-suspected pancreatic involvement of extrapulmonary tuberculosis. *Turk J Gastroenterol.* 2010;21:54-9.
108. Varshney S, Johnson CD. Tuberculosis of the pancreas. *Postgrad Med J.* 1995;71:564-6.
109. Veerabadran P, Sasnur P, Subramanian S, *et al.* Pancreatic tuberculosis-abdominal tuberculosis presenting as pancreatic abscesses and colonic perforation. *World J Gastroenterol.* 2007;13:478-9.
110. Watanapa P, Vathanopas V. Tuberculous pancreatic abscess: a rare condition mimicking carcinoma. *HPB Surg.* 1992;5:209-11
111. Wong-You-Cheong J. An unusual cause of abdominal pain. *Br J Radiol.* 1990 ;63:981-2.
112. Woodfield JC, Windsor JA, Godfrey CC, *et al.* Diagnosis and management of isolated pancreatic tuberculosis: recent experience and literature review. *ANZ J Surg.* 2004;74:368-71.
113. Wu CS, Wang SH, Kuo TT. Pancreatic tuberculosis mimicking pancreatic head carcinoma: a case report and review of the literature. *Infection.* 1994;22:287-9.
114. Yokoyama T, Miyagawa S, Noike T, *et al.* Isolated pancreatic tuberculosis. *Hepatogastroenterology.* 1999;46:2011-4.
115. Zalev AH, Sacks JS, Warren RE. Pancreaticoduodenal tuberculosis simulating metastatic ovarian carcinoma. *Can J Gastroenterol.* 1997;11:41-3.
116. Zheng ZJ, Zhang H, Xiang GM, *et al.* Coexistence of pancreatic carcinoma and pancreatic tuberculosis: case report. *Gut Liver.* 2011;5:536-8.
